# Supplementary material for: Multi-layered Gag-specific immunodominant responses contribute to improved viral control in the CRF01_AE subtype of HIV-1-infected MSM subjects
Source: BMC Immunol. 2016 Aug 30;17(1):28. doi: 10.1186/s12865-016-0166-8 (PMC5006414; doi:10.1186/s12865-016-0166-8)
Supplement: Additional file 1: Table S1. — Peptide matrix setup for Gag, Pol and Nef. (XLSX 12 kb) [file 12865_2016_166_MOESM1_ESM.xlsx]

## Sheet: Sheet1
Table S1: Peptide matrix setup for Gag, Pol and Nef
	pool1	pool2	pool3	pool4	pool5	pool6	pool7	pool8	pool9	pool10	pool11	pool12	pool13	pool14
pool15	OLP-1	OLP-17	OLP-33	OLP-49	OLP-62	OLP-78	OLP-96	OLP-112	OLP-128	OLP-144	OLP-160	OLP-176	OLP-187	OLP-203
pool16	OLP-2	OLP-18	OLP-34	OLP-50	OLP-63	OLP-79	OLP-97	OLP-113	OLP-129	OLP-145	OLP-161	OLP-177	OLP-188	OLP-204
pool17	OLP-3	OLP-19	OLP-35	OLP-51	OLP-64	OLP-80	OLP-98	OLP-114	OLP-130	OLP-146	OLP-162	OLP-178	OLP-189	OLP-205
pool18	OLP-4	OLP-20	OLP-36	OLP-52	OLP-65	OLP-81	OLP-99	OLP-115	OLP-131	OLP-147	OLP-163	OLP-179	OLP-190	OLP-206
pool19	OLP-5	OLP-21	OLP-37	OLP-53	OLP-66	OLP-82	OLP-100	OLP-116	OLP-132	OLP-148	OLP-164	OLP-180	OLP-191	OLP-207
pool20	OLP-6	OLP-22	OLP-38	OLP-54	OLP-67	OLP-83	OLP-101	OLP-117	OLP-133	OLP-149	OLP-165	OLP-181	OLP-192	OLP-208
pool21	OLP-7	OLP-23	OLP-39	OLP-55	OLP-68	OLP-84	OLP-102	OLP-118	OLP-134	OLP-150	OLP-166	OLP-182	OLP-193	OLP-209
pool22	OLP-8	OLP-24	OLP-40	OLP-56	OLP-69	OLP-85	OLP-103	OLP-119	OLP-135	OLP-151	OLP-167	OLP-183	OLP-194	OLP-210
pool23	OLP-9	OLP-25	OLP-41	OLP-57	OLP-70	OLP-86	OLP-104	OLP-120	OLP-136	OLP-152	OLP-168	OLP-184	OLP-195	OLP-211
pool24	OLP-10	OLP-26	OLP-42	OLP-58	OLP-71	OLP-87	OLP-105	OLP-121	OLP-137	OLP-153	OLP-169	OLP-185	OLP-196
pool25	OLP-11	OLP-27	OLP-43	OLP-59	OLP-72	OLP-89	OLP-106	OLP-122	OLP-138	OLP-154	OLP-170	OLP-186	OLP-197
pool26	OLP-12	OLP-28	OLP-44	OLP-60	OLP-73	OLP-91	OLP-107	OLP-123	OLP-139	OLP-155	OLP-171		OLP-198
pool27	OLP-13	OLP-29	OLP-45	OLP-61	OLP-74	OLP-92	OLP-108	OLP-124	OLP-140	OLP-156	OLP-172		OLP-199
pool28	OLP-14	OLP-30	OLP-46		OLP-75	OLP-93	OLP-109	OLP-125	OLP-141	OLP-157	OLP-173		OLP-200
pool29	OLP-15	OLP-31	OLP-47		OLP-76	OLP-94	OLP-110	OLP-126	OLP-142	OLP-158	OLP-174		OLP-201
pool30	OLP-16	OLP-32	OLP-48		OLP-77	OLP-95	OLP-111	OLP-127	OLP-143	OLP-159	OLP-175		OLP-202
Note:
1.OLP-88,OLP-90 did not synthesize successfully
2.Red denotes overlappig peptides of Gag,blue denotes overlappig peptides of Pol,yellow denotes overlappig peptides of Nef
