# Supplementary material for: Multi-layered Gag-specific immunodominant responses contribute to improved viral control in the CRF01_AE subtype of HIV-1-infected MSM subjects
Source: BMC Immunol. 2016 Aug 30;17(1):28. doi: 10.1186/s12865-016-0166-8 (PMC5006414; doi:10.1186/s12865-016-0166-8)
Supplement: Additional file 2: Table S2. — Sequences, position and HLA restriction of optimal epitopes used in this study. (XLSX 24 kb) [file 12865_2016_166_MOESM2_ESM.xlsx]

## Sheet: overlapping peptides
Sequenses and position of overlapping peptides
Peptide name	Sequence	Position(aligned to HXB2)
OLP-1	MGARASVLSGGKLDAWEK	p17(1-18) Gag 1→18
OLP-2	SGGKLDAWEKIRLRPGGK	p17(9-26) Gag 9→26
OLP-3	EKIRLRPGGKKKYRMKHI	p17(17-34) Gag 17→34
OLP-4	GKKKYRMKHIVWASRELE	p17(25-42) Gag 25→42
OLP-5	HIVWASRELERFAVNPGL	p17(33-50) Gag 33→50
OLP-6	LERFAVNPGLLETAEGCQ	p17(41-58) Gag 41→58
OLP-7	GLLETAEGCQQIIEQLQP	p17(49-66) Gag 49→66
OLP-8	CQQIIEQLQPTLKTGSEE	p17(57-74) Gag 57→74
OLP-9	QPTLKTGSEELKSLFNTI	p17(65-82) Gag 65→82
OLP-10	EELKSLFNTIAVLWCVHQ	p17(73-90) Gag 73→90
OLP-11	TIAVLWCVHQKIEVKDTK	p17(81-98) Gag 81→98
OLP-12	HQKIEVKDTKEALDKIEE	p17(89-106) Gag 89→106
OLP-13	TKEALDKIEEVQNKSQQK	p17(97-114) Gag 97→114
OLP-14	EEVQNKSQQKTQQAAAGT	p17(105-122) Gag 105→122
OLP-15	QKTQQAAAGTGSNSKVSQ	p17(113-130) Gag 113→130
OLP-16	GTGSNSKVSQNYPIVQNA	p17-p24(121-6) Gag 121→138
OLP-17	SQNYPIVQNAQGQMVHQS	p17-p24(129-14) Gag 129→146
OLP-18	NAQGQMVHQSLSPRTLNA	p24(5-22) Gag 137→154
OLP-19	QSLSPRTLNAWVKVVEEK	p24(13-30) Gag 145→162
OLP-20	NAWVKVVEEKGFNPEVIP	p24(21-38) Gag 153→170
OLP-21	EKGFNPEVIPMFSALSEG	p24(29-46) Gag 161→178
OLP-22	IPMFSALSEGATPQDLNM	p24(37-54) Gag 169→186
OLP-23	EGATPQDLNMMLNIVGGH	p24(45-62) Gag 177→194
OLP-24	NMMLNIVGGHQAAMQMLK	p24(53-70) Gag 185→202
OLP-25	GHQAAMQMLKETINEEAA	p24(61-78) Gag 193→210
OLP-26	LKETINEEAAEWDRVHPV	p24(69-86) Gag 201→218
OLP-27	AAEWDRVHPVHAGPIPPG	p24(77-94) Gag 209→226
OLP-28	PVHAGPIPPGQMREPRGS	p24(85-102) Gag 217→234
OLP-29	PGQMREPRGSDIAGTTST	p24(93-110) Gag 225→242
OLP-30	GSDIAGTTSTLQEQIGWM	p24(101-118) Gag 233→250
OLP-31	STLQEQIGWMTSNPPIPV	p24(109-126) Gag 241→258
OLP-32	WMTSNPPIPVGDIYKRWI	p24(117-134) Gag 249→266
OLP-33	PVGDIYKRWIILGLNKIV	p24(125-142) Gag 257→274
OLP-34	WIILGLNKIVRMYSPVSI	p24(133-150) Gag 265→282
OLP-35	IVRMYSPVSILDIRQGPK	p24(141-158) Gag 273→290
OLP-36	SILDIRQGPKEPFRDYVD	p24(149-166) Gag 281→298
OLP-37	PKEPFRDYVDRFYKTLRA	p24(157-174) Gag 289→306
OLP-38	VDRFYKTLRAEQATQEVK	p24(165-182) Gag 297→314
OLP-39	RAEQATQEVKNWMTETLL	p24(173-190) Gag 305→322
OLP-40	VKNWMTETLLVQNANPDC	p24(181-198) Gag 313→330
OLP-41	LLVQNANPDCKSILKALG	p24(189-206) Gag 321→338
OLP-42	DCKSILKALGTGATLEEM	p24(197-214) Gag 329→346
OLP-43	LGTGATLEEMMTACQGVG	p24(205-222) Gag 337→354
OLP-44	EMMTACQGVGGPSHKARV	p24(213-230) Gag 345→362
OLP-45	VGGPSHKARVLAEAMSQA	p24-p2p7p1p6(221-7) Gag 353→370
OLP-46	RVLAEAMSQAQTNIMMQR	p24-p2p7p1p6(229-17) Gag 361→380
OLP-47	QAQTNIMMQRGNFKGHKR	p2p7p1p6(6-26) Gag 369→389
OLP-48	QRGNFKGHKRIKCFNCGK	p2p7p1p6(16-34) Gag 379→397
OLP-49	KRIKCFNCGKEGHLARNC	p2p7p1p6(25-42) Gag 388→405
OLP-50	GKEGHLARNCRAPRKKGC	p2p7p1p6(33-50) Gag 396→413
OLP-51	NCRAPRKKGCWKCGKEGH	p2p7p1p6(41-58) Gag 404→421
OLP-52	GCWKCGKEGHQMKDCTER	p2p7p1p6(49-66) Gag 412→429
OLP-53	GHQMKDCTERQANFLGRL	p2p7p1p6(57-74) Gag 420→437
OLP-54	ERQANFLGRLWPSNKGRP	p2p7p1p6(65-82) Gag 428→445
OLP-55	RLWPSNKGRPGNFPQSRT	p2p7p1p6(73-90) Gag 436→453
OLP-56	RPGNFPQSRTEPTAPPAE	p2p7p1p6(81-98) Gag 444→461
OLP-57	RTEPTAPPAENWGMGEET	p2p7p1p6(89-106) Gag 452→469
OLP-58	AENWGMGEETTSSLKQEQ	p2p7p1p6(97-114) Gag 460→477
OLP-59	ETTSSLKQEQKDKGHPPP	p2p7p1p6(105-122) Gag 468→485
OLP-60	EQKDKGHPPPLVSLKSLF	p2p7p1p6(113-130) gag(476-493)
OLP-61	PPLVSLKSLFGNDPLSQ	p2p7p1p6(121-137) gag(484-500)
OLP-62	FFRETVAFQQRKARQFSS	G/P TF(1-18) Pol 1→18
OLP-63	QQRKARQFSSEQNRANSP	G/P TF(9-26) Pol 9→26
OLP-64	SSEQNRANSPTSRKLGDG	G/P TF(17-34) Pol 17→34
OLP-65	SPTSRKLGDGGRDNLLTE	G/P TF(25-42) Pol 25→42
OLP-66	DGGRDNLLTEAGAERQGP	G/P TF(33-50) Pol 33→50
OLP-67	TEAGAERQGPSSSFSFPQ	G/P TF PROT(41-2) Pol 41→58
OLP-68	GPSSSFSFPQITLWQRPL	G/P TF PROT(49-10) Pol 49→66
OLP-69	PQITLWQRPLVTIKIGGQ	PROT(1-18) Pol 57→74
OLP-70	PLVTIKIGGQMKEALLDT	PROT(9-26) Pol 65→82
OLP-71	GQMKEALLDTGADDTVLE	PROT(17-34) Pol 73→90
OLP-72	DTGADDTVLEDINLPGKW	PROT(25-42) Pol 81→98
OLP-73	LEDINLPGKWKPKMIGGI	PROT(33-50) Pol 89→106
OLP-74	KWKPKMIGGIGGFIKVRQ	PROT(41-58) Pol 97→114
OLP-75	GIGGFIKVRQYDQILIEI	PROT(49-66) Pol 105→122
OLP-76	RQYDQILIEICGKKAIGT	PROT(57-74) Pol 113→130
OLP-77	EICGKKAIGTVLVGPTPV	PROT(65-82) Pol 121→138
OLP-78	GTVLVGPTPVNIIGRNML	PROT(73-90) Pol 129→146
OLP-79	PVNIIGRNMLTQLGCTLN	PROT(81-98) Pol 137→154
OLP-80	MLTQLGCTLNFPISPIDT	PROT-RT(89-7) Pol 145→162
OLP-81	LNFPISPIDTVPVKLKPG	PROT-RT(97-15) Pol 153→170
OLP-82	DTVPVKLKPGMDGPKVKQ	RT(6-23) Pol 161→178
OLP-83	PGMDGPKVKQWPLTEEKI	RT(14-31) Pol 169→186
OLP-84	KQWPLTEEKIKALTEICK	RT(22-39) Pol 177→194
OLP-85	KIKALTEICKEMEEEGKI	RT(30-47) Pol 185→202
OLP-86	CKEMEEEGKISKIGPENP	RT(38-55) Pol 193→210
OLP-87	KISKIGPENPYNTPVFAI	RT(46-63) Pol 201→218
OLP-88	NPYNTPVFAIKKKDSTKW	RT(54-71) Pol 209→226
OLP-89	AIKKKDSTKWRKLVDFRE	RT(62-79) Pol 217→234
OLP-90	KWRKLVDFRELNKRTQDF	RT(70-87) Pol 225→242
OLP-91	RELNKRTQDFWEVQLGIP	RT(78-95) Pol 233→250
OLP-92	DFWEVQLGIPHPAGLKKK	RT(86-103) Pol 241→258
OLP-93	IPHPAGLKKKKSVTVLDV	RT(94-111) Pol 249→266
OLP-94	KKKSVTVLDVGDAYFSVP	RT(102-119) Pol 257→274
OLP-95	DVGDAYFSVPLDESFRKY	RT(110-127) Pol 265→282
OLP-96	VPLDESFRKYTAFTIPST	RT(118-135) Pol 273→290
OLP-97	KYTAFTIPSTNNETPGIR	RT(126-143) Pol 281→298
OLP-98	STNNETPGIRYQYNVLPQ	RT(134-151) Pol 289→306
OLP-99	IRYQYNVLPQGWKGSPAI	RT(142-159) Pol 297→314
OLP-100	PQGWKGSPAIFQSSMTKI	RT(150-167) Pol 305→322
OLP-101	AIFQSSMTKILEPFRIKN	RT(158-175) Pol 313→330
OLP-102	KILEPFRIKNPEIVIYQY	RT(166-183) Pol 321→338
OLP-103	KNPEIVIYQYMDDLYVGS	RT(174-191) Pol 329→346
OLP-104	QYMDDLYVGSDLEIGQHR	RT(182-199) Pol 337→354
OLP-105	GSDLEIGQHRIKIEELRA	RT(190-207) Pol 345→362
OLP-106	HRIKIEELRAHLLSWGLT	RT(198-215) Pol 353→370
OLP-107	RAHLLSWGLTTPDKKHQK	RT(206-223) Pol 361→378
OLP-108	LTTPDKKHQKEPPFLWMG	RT(214-231) Pol 369→386
OLP-109	QKEPPFLWMGYELHPDRW	RT(222-239) Pol 377→394
OLP-110	MGYELHPDRWTVQPIELP	RT(230-247) Pol 385→402
OLP-111	RWTVQPIELPEKDSWTVN	RT(238-255) Pol 393→410
OLP-112	LPEKDSWTVNDIQKLVGK	RT(246-263) Pol 401→418
OLP-113	VNDIQKLVGKLNWASQIY	RT(254-271) Pol 409→426
OLP-114	GKLNWASQIYAGIKVKQL	RT(262-279) Pol 417→434
OLP-115	IYAGIKVKQLCKLLRGAK	RT(270-287) Pol 425→442
OLP-116	QLCKLLRGAKALTDIVPL	RT(278-295) Pol 433→450
OLP-117	AKALTDIVPLTEEAELEL	RT(286-303) Pol 441→458
OLP-118	PLTEEAELELAENREILK	RT(294-311) Pol 449→466
OLP-119	ELAENREILKTPVHGVYY	RT(302-319) Pol 457→474
OLP-120	LKTPVHGVYYDPSKDLVA	RT(310-327) Pol 465→482
OLP-121	YYDPSKDLVAEVQKQGQD	RT(318-335) Pol 473→490
OLP-122	VAEVQKQGQDQWTYQIYQ	RT(326-343) Pol 481→498
OLP-123	QDQWTYQIYQEPFKNLKT	RT(334-351) Pol 489→506
OLP-124	YQEPFKNLKTGKYARKRS	RT(342-359) Pol 497→514
OLP-125	KTGKYARKRSAHTNDVRQ	RT(350-367) Pol 505→522
OLP-126	RSAHTNDVRQLAEVVQKI	RT(358-375) Pol 513→530
OLP-127	RQLAEVVQKIATESIVIW	RT(366-383) Pol 521→538
OLP-128	KIATESIVIWGKTPKFRL	RT(374-391) Pol 529→546
OLP-129	IWGKTPKFRLPIQRETWE	RT(382-399) Pol 537→554
OLP-130	RLPIQRETWETWWTEYWQ	RT(390-407) Pol 545→562
OLP-131	WETWWTEYWQATWIPEWE	RT(398-415) Pol 553→570
OLP-132	WQATWIPEWEFVNTPPLV	RT(406-423) Pol 561→578
OLP-133	WEFVNTPPLVKLWYQLEK	RT(414-431) Pol 569→586
OLP-134	LVKLWYQLEKDPIVGAET	RT(422-439) Pol 577→594
OLP-135	EKDPIVGAETFYVDGAAS	RT(430-447) Pol 585→602
OLP-136	ETFYVDGAASKETKLGKA	RT(438-455) Pol 593→610
OLP-137	ASKETKLGKAGYVTNRGR	RT(446-463) Pol 601→618
OLP-138	KAGYVTNRGRQKVVSLTE	RT(454-471) Pol 609→626
OLP-139	GRQKVVSLTETTNQKTEL	RT(462-479) Pol 617→634
OLP-140	TETTNQKTELHAIYLALQ	RT(470-487) Pol 625→642
OLP-141	ELHAIYLALQDSGSEVNI	RT(478-495) Pol 633→650
OLP-142	LQDSGSEVNIVTDSQYAL	RT(486-503) Pol 641→658
OLP-143	NIVTDSQYALGIIQAQPD	RT(494-511) Pol 649→666
OLP-144	ALGIIQAQPDRSESEIVN	RT(502-519) Pol 657→674
OLP-145	PDRSESEIVNQIIEELVK	RT(510-527) Pol 665→682
OLP-146	VNQIIEELVKKEKVYLSW	RT(518-535) Pol 673→690
OLP-147	VKKEKVYLSWVPAHKGIG	RT(526-543) Pol 681→698
OLP-148	SWVPAHKGIGGNEQVDKL	RT(534-551) Pol 689→706
OLP-149	IGGNEQVDKLVSSGIRKV	RT(542-559) Pol 697→714
OLP-150	KLVSSGIRKVLFLDGIDK	RT-Integrase(550-7) Pol 705→722
OLP-151	KVLFLDGIDKAQEEHERY	RT-Integrase(558-15) Pol 713→730
OLP-152	DKAQEEHERYHSNWRTMA	Integrase(6-23) Pol 721→738
OLP-153	RYHSNWRTMASDFNLPPI	Integrase(14-31) Pol 729→746
OLP-154	MASDFNLPPIVAKEIVAS	Integrase(22-39) Pol 737→754
OLP-155	PIVAKEIVASCDKCQLKG	Integrase(30-47) Pol 745→762
OLP-156	ASCDKCQLKGEAMHGQVD	Integrase(38-55) Pol 753→770
OLP-157	KGEAMHGQVDCSPGIWQL	Integrase(46-63) Pol 761→778
OLP-158	VDCSPGIWQLDCTHLEGK	Integrase(54-71) Pol 769→786
OLP-159	QLDCTHLEGKIILVAVHV	Integrase(62-79) Pol 777→794
OLP-160	GKIILVAVHVASGYIEAE	Integrase(70-87) Pol 785→802
OLP-161	HVASGYIEAEVIPAETGQ	Integrase(78-95) Pol 793→810
OLP-162	AEVIPAETGQETAYFLLK	Integrase(86-103) Pol 801→818
OLP-163	GQETAYFLLKLAGRWPVK	Integrase(94-111) Pol 809→826
OLP-164	LKLAGRWPVKVIHTDNGS	Integrase(102-119) Pol 817→834
OLP-165	VKVIHTDNGSNFTSAAVK	Integrase(110-127) Pol 825→842
OLP-166	GSNFTSAAVKAACWWANV	Integrase(118-135) Pol 833→850
OLP-167	VKAACWWANVRQEFGIPY	Integrase(126-143) Pol 841→858
OLP-168	NVRQEFGIPYNPQSQGVV	Integrase(134-151) Pol 849→866
OLP-169	PYNPQSQGVVESMNKELK	Integrase(142-159) Pol 857→874
OLP-170	VVESMNKELKKIIGQVRE	Integrase(150-167) Pol 865→882
OLP-171	LKKIIGQVREQAEHLKTA	Integrase(158-175) Pol 873→890
OLP-172	REQAEHLKTAVQMAVFIH	Integrase(166-183) Pol 881→898
OLP-173	TAVQMAVFIHNFKRKGGI	Integrase(174-191) Pol 889→906
OLP-174	IHNFKRKGGIGGYSAGER	Integrase(182-199) Pol 897→914
OLP-175	GIGGYSAGERIIDIIATD	Integrase(190-207) Pol 905→922
OLP-176	ERIIDIIATDIQTKELQK	Integrase(198-215) Pol 913→930
OLP-177	TDIQTKELQKQITKIQNF	Integrase(206-223) Pol 921→938
OLP-178	QKQITKIQNFRVYYRDSR	Integrase(214-231) Pol 929→946
OLP-179	NFRVYYRDSRDPIWKGPA	Integrase(222-239) Pol 937→954
OLP-180	SRDPIWKGPAKLLWKGEG	Integrase(230-247) Pol 945→962
OLP-181	PAKLLWKGEGAVVIQDNS	Integrase(238-255) Pol 953→970
OLP-182	EGAVVIQDNSDIKVVPRR	Integrase(246-263) Pol 961→978
OLP-183	NSDIKVVPRRKAKIIRDY	Integrase(254-271) Pol 969→986
OLP-184	RRKAKIIRDYGKQMAGDD	Integrase(262-279) Pol 977→994
OLP-185	DYGKQMAGDDCVAGRQDE	Integrase(270-287) Pol 985→1002
OLP-186	DDCVAGRQDED	Integrase(278-288) Pol 993→1003
OLP-187	MGGKWSKSSIVGWPQVRE	NEF(1-18)
OLP-188	SIVGWPQVRERIKQTPPP	NEF(9-26)
OLP-189	RERIKQTPPPATEVGAVS	NEF(17-34)
OLP-190	PPPATEVGAVSQDLDKHG	NEF(24-41)
OLP-191	AVSQDLDKHGAVTSSNMN	NEF(32-51)
OLP-192	HGAVTSSNMNNADCVWLR	NEF(40-59)
OLP-193	NMNNADCVWLRAQEEDEE	NEF(47-65)
OLP-194	WLRAQEEDEEGVGFPVRP	Nef 57→72
OLP-195	EEGVGFPVRPQVPLRPMT	Nef 63→80
OLP-196	RPQVPLRPMTYKGAFDLS	Nef 71→88
OLP-197	MTYKGAFDLSFFLKEKGG	Nef 79→96
OLP-198	LSFFLKEKGGLDGLIYSK	Nef 87→104
OLP-199	GGLDGLIYSKKRQEILDL	Nef 95→112
OLP-200	SKKRQEILDLWVYNTQGF	Nef 103→120
OLP-201	DLWVYNTQGFFPDWHNYT	Nef 111→128
OLP-202	GFFPDWHNYTPGPGIRYP	Nef 119→136
OLP-203	YTPGPGIRYPLCFGWCFK	Nef 127→144
OLP-204	YPLCFGWCFKLVPVDPIE	Nef 135→152
OLP-205	FKLVPVDPIEVEEDNKGE	Nef 143→160
OLP-206	IEVEEDNKGENSCLLHPM	Nef 151→168
OLP-207	GENSCLLHPMNQHGIEDE	Nef 159→176
OLP-208	PMNQHGIEDEEREVLMWK	Nef 167→184
OLP-209	DEEREVLMWKFDSALARK	Nef 175→192
OLP-210	WKFDSALARKHIARELHP	Nef 183→200
OLP-211	RKHIARELHPEYYKDC	Nef 191→206

## Sheet: optimal epitopes
Table S2: Sequences, position and HLA restriction of optimal epitopes used in this study
Peptide Name	Sequence	Position(aligned to HXB2)	HLA restriction
PL10-A02	PLCFGWCFKL	Nef 136-145	A0201
VL10-A02	VLMWKFDSAL	Nef 180-189	A0201
FK10-A02	FLGRLWPSNK	Gag 433-442	A0201
SL9-A02	SLFNTIAVL	Gag 77-85	A0201
LI9-A02	LVGPTPVNI	Pol 132-140	A0201
VL9-A02	VIYQYMDDL	Pol 334-342	A0201
IV9-A02	ILKTPVHGV	Pol 464-472	A0201
AM9-A02	ALTEICKEM	Pol 188-196	A0201
AK10-A11	AVFIHNFKRK	Pol 894-903	A11
IK9-A11	IIATDIQTK	Pol 918-926	A11
PK8-A11	PLRPMTYK	Nef 75-82	A11
AK9-A11	AFDLSFFLK	Nef 84-92	A11
VK8-A11	VLWCVHQK	Gag 84-91	A11
AK11-A11	ACQGVGGPSHK	Gag 349-359	A11
AK9-A11	AIFQSSMTK	Pol 313-321	A11
IK10-A11	IYQEPFKNLK	Pol 496-505	A11
QK9-A11	QIIEELVKK	Pol 675-683	A11
GY9-A24	GFFPDWHNY	Nef 119-127	A24
RW8-A24	RYPLCFGW	Nef 134-141	A24
KW9-A24	KYRMKHIVW	Gag 28-36	A24
RL11-A24	RDYVDRFYKTL	Gag 294-304	A24
IL9-A24	IYQEPFKNL	Pol 496-504	A24
RV9-B13	RQEILDLWV	Nef 106-114	B13
RL9-B13	RQANFLGRL	Gag 429-437	B13
VV9-B13	VQNAQGQMV	Gag 135-143	B13
GI11-B13	GQMREPRGSDI	Gag 226-236	B13
RI10-B13	RQYDQILIEI	Pol 113-122	B13
GI9-B13	GQDQWTYQI	Pol 488-496	B13
KK10-B27	KRWIILGLNK	Gag 263-272	B27
GI8-B40	GERIIDII	Pol 912-919	B40
TL8-B40	TDIQTKEL	Pol 921-928	B40
IT10-B40	IEAEVIPAET	Pol 799-808	B40
EL11-B40	ETGQETAYFLL	Pol 807-817	B40
LS9-B40	LDKHGAVTS	Nef 37-45	B40
KL9-B40	KEKGGLDGL	Nef 92-100	B40
GL9-B40	GHPPPLVSL	Gag 481-489	B40
TL8-B40	TERQANFL	Gag 427-434	B40
GI9-B40	GKLDAWEKI	Gag 11-19	B40
IL10-B40	IEVKDTKEAL	Gag 92-101	B40
SL9-B40	SEGATPQDL	Gag 176-184	B40
KA9-B40	KETINEEAA	Gag 202-210	B40
AV9-B40	AEWDRVHPV	Gag 210-218	B40
IL9-B40	IEELRAHLL	Pol 357-365	B40
IL8-B40	IDTVPVKL	Pol 160-167	B40
LI9-B51	LPPIVAKEI	Pol 743-751	B51
RM10-B51	RPGGKKKYRM	Gag 22-31	B51
RV9-B51	RAEQATQEV	Gag 305-313	B51
TT8-B51	TAFTIPST	Pol 283-290	B51
EI9-B51	EEEGKISKI	Pol 197-205	B51
